# Supplementary material for: The TAS1R2 G-protein-coupled receptor is an ambient glucose sensor in skeletal muscle that regulates NAD homeostasis and mitochondrial capacity
Source: Nat Commun. 2024 Jun 8;15:4915. doi: 10.1038/s41467-024-49100-8 (PMC11162498; doi:10.1038/s41467-024-49100-8)
Supplement: Supplementary file 5 — Inventory of Supplementary information [file 41467_2024_49100_MOESM5_ESM.xlsx]

## Sheet: Nucleotides
	Complementary data - Quantitative targeted nucleotide analysis in bWT and bKO muscles using LC/MS
	Source data (nmol/mg dry tissue weight)
	BLOQ= Below Level of Quantification
	Subject	1-Methyl NAM	NAM	NAMN	NMN	NAD	NAAD	NADP	AMP	cAMP	ADP	ADPR	ATP	GMP	cGMP	GDP	GTP	CMP	CDP	CTP	UMP	UDP	UTP	TMP	TDP	TTP	IMP	IDP	ITP	NADH	NADPH
	bWT-01	BLOQ	0.651259	BLOQ	0.00377701	1.2504	BLOQ	0.0336179	1.0953	BLOQ	11.7407	12.1856	23.9576	BLOQ	BLOQ	0.173454	0.360896	0.039972	0.0464389	0.111884	0.0329449	0.0685092	0.314422	BLOQ	BLOQ	BLOQ	2.69391	0.0261734	0.0139027	0.0808413	0.0439573
	bWT-02	BLOQ	0.771841	BLOQ	0.00418411	1.47599	BLOQ	0.0370074	1.0799	BLOQ	12.9899	16.9854	20.9158	0.0267274	BLOQ	0.176714	0.413925	0.0482635	0.0486437	0.134429	0.0339802	0.0877654	0.382899	BLOQ	BLOQ	BLOQ	5.76759	0.056277	0.030243	0.120846	0.097295
	bWT-03	BLOQ	0.640645	BLOQ	0.00382428	1.14806	BLOQ	0.0390686	0.872093	BLOQ	10.4577	11.1383	22.8899	BLOQ	BLOQ	0.132169	0.349716	0.033695	0.0421905	0.116453	0.0216368	0.0709802	0.31778	BLOQ	0.00750064	BLOQ	4.09468	0.0389676	0.0261396	0.139205	0.131866
	bWT-04	BLOQ	0.443603	BLOQ	0.00300131	0.900617	BLOQ	0.0267672	0.658239	BLOQ	6.11527	9.88446	14.4834	BLOQ	BLOQ	0.100974	0.276227	0.0259344	0.0319721	0.0898259	0.0226302	0.049527	0.24431	BLOQ	BLOQ	BLOQ	2.4063	0.0235422	0.0185963	0.044915	0.0273593
	bWT-05	BLOQ	0.80228	BLOQ	0.00344841	1.64169	BLOQ	0.0391388	1.33275	BLOQ	11.7054	21.7805	18.4157	0.0257401	BLOQ	0.2181	0.440142	0.0503725	0.0783917	0.178314	0.0417121	0.118731	0.509673	BLOQ	0.00623059	BLOQ	4.329	0.0472444	0.0159596	0.0580729	0.0305431
	bWT-06	BLOQ	0.700493	BLOQ	0.00275133	1.24529	BLOQ	0.0345383	1.31001	BLOQ	11.5668	11.538	18.7129	0.0233296	BLOQ	0.187794	0.325676	0.0408756	0.0518172	0.111308	0.0425084	0.0991444	0.327933	BLOQ	BLOQ	BLOQ	1.26398	0.0202224	0.0103412	0.0742942	0.0386098
	bWT-07	BLOQ	0.734153	BLOQ	0.00315543	1.21439	BLOQ	0.0325546	1.23394	BLOQ	8.33516	10.1409	15.8666	0.0263183	BLOQ	0.184796	0.324168	0.0371764	0.0566631	0.113914	0.0447279	0.0875251	0.305164	BLOQ	BLOQ	BLOQ	1.26324	0.0160543	0.0104365	0.0784968	0.0422117
	bWT-08	BLOQ	0.669213	BLOQ	0.00400676	1.28277	BLOQ	0.031038	1.29201	BLOQ	11.3326	19.9619	17.6613	BLOQ	BLOQ	0.222297	0.369865	0.0390899	0.0668128	0.130719	0.0403564	0.14486	0.372984	BLOQ	BLOQ	BLOQ	1.35857	0.0183971	0.00930599	0.0562278	0.0751943
	bWT-09	BLOQ	0.732582	BLOQ	0.00328924	1.53715	BLOQ	0.0386799	1.18473	BLOQ	14.1452	12.1196	28.9176	BLOQ	BLOQ	0.17936	0.439786	0.0473619	0.046756	0.14078	0.0400506	0.0817242	0.407588	BLOQ	BLOQ	BLOQ	1.64732	0.0199268	0.011069	0.0735599	0.0568334
	bWT-10	BLOQ	0.721358	BLOQ	0.00368397	1.50291	BLOQ	0.0333201	1.14999	BLOQ	16.432	10.3806	19.1159	BLOQ	BLOQ	0.182027	0.411537	0.0453244	0.048936	0.139018	0.0398371	0.0792597	0.415722	BLOQ	BLOQ	BLOQ	0.215095	BLOQ	0.00565617	0.0513089	0.0376286
	bWT-11	BLOQ	0.662382	BLOQ	0.00503952	1.50572	BLOQ	0.0336194	1.11596	BLOQ	8.89537	6.25526	18.7438	BLOQ	BLOQ	0.1667	0.384788	0.0421463	0.045662	0.125606	0.031043	0.0657244	0.390344	BLOQ	BLOQ	BLOQ	0.416992	BLOQ	0.00642295	0.0629067	0.0458593
	bWT-12	BLOQ	0.746975	BLOQ	0.00420513	1.47754	BLOQ	0.044311	1.01422	BLOQ	12.5699	5.51995	27.0765	BLOQ	BLOQ	0.15686	0.474218	0.0391016	0.0446933	0.164148	0.0326082	0.0658139	0.41776	BLOQ	0.0132142	BLOQ	2.17553	0.0191493	0.0222966	0.126931	0.144104
	bWT-13	BLOQ	0.628602	BLOQ	0.00451777	1.21401	BLOQ	0.0355823	0.954832	BLOQ	9.8289	3.56074	22.2765	BLOQ	BLOQ	0.141733	0.385825	0.0319445	0.0418625	0.11888	0.0278135	0.0627375	0.318625	BLOQ	BLOQ	BLOQ	0.856943	0.0132655	0.0100008	0.0663048	0.0526855
	bWT-14	BLOQ	0.736492	BLOQ	0.00457085	1.43197	BLOQ	0.0395551	1.10927	BLOQ	10.3197	3.83298	18.95	BLOQ	BLOQ	0.158458	0.403216	0.0397712	0.0500742	0.136621	0.0328513	0.0711028	0.33843	BLOQ	BLOQ	BLOQ	1.4917	0.019698	0.0104324	0.157406	0.101206
	bWT-15	BLOQ	0.631749	BLOQ	0.00493055	1.23834	BLOQ	0.0284542	1.05634	BLOQ	8.51805	2.65967	16.9635	BLOQ	BLOQ	0.147433	0.33476	0.0326258	0.0487967	0.119172	0.0308396	0.0688935	0.334659	BLOQ	BLOQ	BLOQ	1.94771	0.025137	0.0111114	0.177331	0.270525
	bWT-16	BLOQ	0.686349	BLOQ	0.00455484	1.35021	BLOQ	0.0318033	0.925393	BLOQ	6.21547	2.97115	12.6073	BLOQ	BLOQ	0.172	0.379142	0.0352225	0.054022	0.129549	0.0288467	0.0925973	0.391245	BLOQ	0.0083357	BLOQ	7.03643	0.0660793	0.0300878	0.303049	0.231338
	bWT-17	BLOQ	0.566309	BLOQ	0.00213387	1.07421	BLOQ	0.0270656	0.874817	BLOQ	7.83241	1.93812	19.3622	BLOQ	BLOQ	0.136106	0.340339	0.0302284	0.0380238	0.114666	0.0241636	0.0645718	0.296994	BLOQ	BLOQ	BLOQ	1.55153	0.0198981	0.0127358	0.188628	0.317846
	bKO-01	BLOQ	0.879967	BLOQ	0.00432838	1.69764	BLOQ	0.0450243	1.28855	BLOQ	11.4596	3.36275	27.7325	0.0311136	BLOQ	0.189139	0.478138	0.0507337	0.0624508	0.178892	0.0440388	0.102185	0.566586	BLOQ	0.00653363	BLOQ	3.90908	0.0420291	0.0283838	0.131947	0.13756
	bKO-02	BLOQ	0.682464	BLOQ	0.00409887	1.49101	BLOQ	0.0425548	1.08129	BLOQ	11.6883	0.216076	29.4949	BLOQ	BLOQ	0.167098	0.371545	0.0480986	0.0535576	0.131425	0.0310794	0.08242	0.386764	BLOQ	BLOQ	BLOQ	0.764829	BLOQ	0.00666889	0.0686703	0.0949363
	bKO-03	BLOQ	0.503049	BLOQ	0.00253404	0.96733	BLOQ	0.0253335	0.791666	BLOQ	8.14483	0.155693	17.937	BLOQ	BLOQ	0.144671	0.256323	0.029238	0.0419831	0.0869555	0.0218565	0.0669013	0.224345	BLOQ	BLOQ	BLOQ	1.9064	0.0267037	0.00678147	0.262398	0.224335
	bKO-04	BLOQ	0.687673	BLOQ	0.00349758	1.46245	BLOQ	0.0356634	1.13356	BLOQ	12.1924	0.217847	28.6155	BLOQ	BLOQ	0.174062	0.398161	0.0434182	0.0545614	0.134045	0.0313188	0.0825952	0.405421	BLOQ	0.00655549	BLOQ	1.8178	0.02065	0.00867681	0.0798986	0.114739
	bKO-05	BLOQ	0.617178	BLOQ	0.00236863	1.3653	BLOQ	0.0296905	1.01744	BLOQ	11.2084	0.220852	31.1124	BLOQ	BLOQ	0.156048	0.383812	0.0387605	0.0466885	0.128104	0.0309323	0.0720268	0.350021	BLOQ	BLOQ	BLOQ	0.548008	BLOQ	0.00485372	0.0761244	0.0524494
	bKO-06	BLOQ	0.874287	BLOQ	0.00458289	1.81489	BLOQ	0.0491719	1.15843	BLOQ	12.1189	0.279578	33.5301	0.0292002	BLOQ	0.207975	0.519187	0.0512175	0.0689755	0.189943	0.0389343	0.104627	0.559224	BLOQ	BLOQ	BLOQ	3.87759	0.0389078	0.029079	0.258519	0.222449
	bKO-07	BLOQ	0.702743	BLOQ	0.00352596	1.53584	BLOQ	0.0307015	1.26001	BLOQ	13.3611	0.241308	27.9807	0.0268467	BLOQ	0.201836	0.391016	0.043517	0.0550685	0.131066	0.0412341	0.0850894	0.390611	BLOQ	BLOQ	BLOQ	1.70575	0.0228942	0.0098144	0.0688578	0.0589572
	bKO-08	BLOQ	0.686018	BLOQ	0.00332968	1.40685	BLOQ	0.0318272	0.948409	BLOQ	9.12989	0.192827	25.856	BLOQ	BLOQ	0.154155	0.381366	0.0404549	0.0532798	0.138521	0.0301629	0.092675	0.379534	BLOQ	0.00645843	BLOQ	2.07475	0.0259522	0.0097912	0.0862187	0.080521
	bKO-09	BLOQ	0.732709	BLOQ	0.00192439	1.45846	BLOQ	0.0272993	1.07418	BLOQ	12.1381	0.276938	28.3539	BLOQ	BLOQ	0.169623	0.404374	0.0404246	0.0538084	0.146093	0.0409114	0.0820851	0.36007	BLOQ	BLOQ	BLOQ	1.04293	0.0152167	0.0071436	0.0819989	0.0542255
	bKO-10	BLOQ	0.795102	BLOQ	0.00447701	1.63338	BLOQ	0.03579	1.2502	BLOQ	15.049	0.276109	32.0537	0.0246949	BLOQ	0.194874	0.422292	0.0493569	0.0600699	0.158515	0.0330222	0.0991735	0.416734	BLOQ	BLOQ	BLOQ	0.37378	BLOQ	0.00534787	0.0964977	0.0859031
	bKO-11	BLOQ	0.747743	BLOQ	0.00453476	1.41976	BLOQ	0.0313877	1.06462	BLOQ	10.8886	0.243033	31.37	0.0250015	BLOQ	0.159312	0.420643	0.0422742	0.049436	0.140688	0.032172	0.0828112	0.37631	BLOQ	BLOQ	BLOQ	2.28074	0.0263518	0.0175199	0.324757	0.197469
	bKO-12	BLOQ	0.650807	BLOQ	0.00226608	1.30484	BLOQ	0.0348589	1.02209	BLOQ	11.7159	0.210851	26.6813	BLOQ	BLOQ	0.169586	0.379816	0.04277	0.0510529	0.132471	0.0379928	0.0687728	0.323818	BLOQ	BLOQ	BLOQ	2.99155	0.0300909	0.016922	0.288034	0.264034
	bKO-13	BLOQ	0.804813	BLOQ	0.00394499	1.53046	BLOQ	0.0397362	1.31259	BLOQ	15.417	0.274598	30.1256	0.0286631	BLOQ	0.220834	0.424531	0.0511271	0.0597499	0.145736	0.0361884	0.106412	0.412099	BLOQ	BLOQ	BLOQ	2.01017	0.018266	0.00772362	0.100682	0.0599052
	bKO-14	BLOQ	0.732355	BLOQ	0.00342196	1.47959	BLOQ	0.0374905	1.21872	BLOQ	14.9354	0.24825	27.457	BLOQ	BLOQ	0.20089	0.384635	0.038476	0.0568337	0.132734	0.0316092	0.0875372	0.368017	BLOQ	BLOQ	BLOQ	3.54109	0.0465338	0.0147841	0.0538903	0.0756801
	bKO-15	BLOQ	0.610104	BLOQ	0.00304587	1.32336	BLOQ	0.0339976	1.06028	BLOQ	13.1581	0.222684	23.6452	BLOQ	BLOQ	0.184458	0.338685	0.038026	0.0492122	0.113684	0.0333917	0.0773288	0.344592	BLOQ	BLOQ	BLOQ	3.15565	0.0430614	0.0101679	0.101736	0.0787071
	bKO-16	BLOQ	0.686906	BLOQ	0.00381099	1.4233	BLOQ	0.0327272	1.14192	BLOQ	13.2432	0.213948	24.0847	BLOQ	BLOQ	0.192974	0.386611	0.0388669	0.0569429	0.132872	0.0343147	0.0870881	0.359806	BLOQ	BLOQ	BLOQ	3.48293	0.0444308	0.00829555	0.201321	0.377291
	bKO-17	BLOQ	0.789102	BLOQ	0.00301752	1.76874	BLOQ	0.0380527	1.41318	BLOQ	17.9848	0.244498	35.1661	BLOQ	BLOQ	0.217225	0.461477	0.0440301	0.0552849	0.140581	0.0407106	0.092276	0.444856	BLOQ	BLOQ	BLOQ	0.556794	BLOQ	0.00332061	0.0580452	0.077753
	bKO-18	BLOQ	0.805988	BLOQ	0.00303497	1.5813	BLOQ	0.0385032	1.2553	BLOQ	15.0483	0.249624	26.9928	BLOQ	BLOQ	0.229658	0.455703	0.0496443	0.0607414	0.144706	0.0360043	0.110018	0.4905	BLOQ	0.00727654	BLOQ	3.92255	0.0502827	0.014991	0.188269	0.364847

## Sheet: Fig.1b
	Fig. 1b - Expression of the sweet taste receptor genes, Tas1r2 and Tas1r3, in skeletal muscle homogenates
	Source data
		Tas1R2									Tas1R3
		Soleus	Quad	TA	Gastroc	Plantaris	EDL				Soleus	Quad	TA	Gastroc	Plantaris	EDL
		4.07112e-08	7.47645e-09	1.97305e-08	1.21877e-08	3.31826e-08	1.22725e-08				4.99875e-06	1.07666e-06	2.5255e-06	3.13088e-06	2.9826e-06	2.15333e-06
		3.72031e-08	9.69575e-09	6.73815e-09	9.14101e-09	1.17725e-08	6.24349e-09				3.63403e-06	2.24477e-06	4.81177e-06	3.84123e-06	4.48954e-06	1.60945e-06
		3.98733e-08	8.58818e-09	9.46336e-09	6.73815e-09	1.79679e-08	7.47645e-09				5.64342e-06	1.23248e-06	2.41424e-06	1.22397e-06	3.72327e-06	1.77962e-06
		7.01491e-08	1.09462e-08	1.33369e-08	5.47308e-09	1.36171e-08	1.44937e-08				6.32721e-06	1.70122e-06	1.68947e-06	2.10172e-06	3.24129e-06	3.88138e-06
		1.93244e-08	1.72958e-08	8.76864e-09	1.34297e-08	1.26175e-08	2.73289e-08				1.46568e-06	2.48211e-06	2.76364e-06	3.40244e-06	4.64787e-06	1.94743e-06
		6.82309e-08	6.94235e-08		1.44937e-08	5.87841e-08					8.49473e-06	5.08613e-06	2.96199e-06	2.8512e-06	4.07435e-06	3.01377e-06
	Descriptives
		Tas1R2									Tas1R3
		Soleus	Quad	TA	Gastroc	Plantaris	EDL				Soleus	Quad	TA	Gastroc	Plantaris	EDL
	Number of values	6	6	5	6	6	5			Number of values	6	6	6	6	6	6
	Minimum	1.932e-08	7.476e-09	6.738e-09	5.473e-09	1.177e-08	6.243e-09			Minimum	1.466e-06	1.077e-06	1.689e-06	1.224e-06	2.983e-06	1.609e-06
	Maximum	7.015e-08	6.942e-08	1.973e-08	1.449e-08	5.878e-08	2.733e-08			Maximum	8.495e-06	5.086e-06	4.812e-06	3.841e-06	4.648e-06	3.881e-06
	Range	5.082e-08	6.195e-08	1.299e-08	9.021e-09	4.701e-08	2.109e-08			Range	7.029e-06	4.009e-06	3.122e-06	2.617e-06	1.665e-06	2.272e-06
	Mean	4.592e-08	2.057e-08	1.161e-08	1.024e-08	2.466e-08	1.356e-08			Mean	5.094e-06	2.304e-06	2.861e-06	2.759e-06	3.86e-06	2.397e-06
	Std. Deviation	1.966e-08	2.418e-08	5.132e-09	3.695e-09	1.852e-08	8.406e-09			Std. Deviation	2.396e-06	1.469e-06	1.05e-06	9.508e-07	6.685e-07	8.771e-07
	Std. Error of Mean	8.025e-09	9.871e-09	2.295e-09	1.508e-09	7.561e-09	3.759e-09			Std. Error of Mean	9.78e-07	5.998e-07	4.286e-07	3.882e-07	2.729e-07	3.581e-07
	Lower 95% CI of mean	2.529e-08	-4.804e-09	5.236e-09	6.366e-09	5.222e-09	3.125e-09			Lower 95% CI of mean	2.58e-06	7.62e-07	1.759e-06	1.761e-06	3.158e-06	1.477e-06
	Upper 95% CI of mean	6.654e-08	4.595e-08	1.798e-08	1.412e-08	4.409e-08	2.4e-08			Upper 95% CI of mean	7.608e-06	3.846e-06	3.963e-06	3.756e-06	4.561e-06	3.318e-06

## Sheet: Fig.1c
	Fig. 1c - Specific expression of Tas1r2 and Tas1r3 in myocytes from soleus (Sol), Quadriceps (Quad) and Tibialis Anterior (TA) using HA-mRNA pulldown from HA-RiboTag-Myo mice
	Source data	Quad						TA						Sol
	Tas1r2	3.34846e-07	2.6546e-07	8.22733e-08	1.22137e-07			1.56211e-07	3.05993e-07	1.3273e-07	1.43743e-07			1.36753e-06	5.12836e-07	1.19878e-06	4.51115e-07	2.30788e-06
	Tas1r3	3.16783e-07	4.09396e-07	1.6172e-07	2.09725e-07			2.14875e-07	5.43959e-07	2.48543e-07	2.89487e-07			3.12005e-06	1.01155e-06	1.89417e-06	6.2919e-07	3.55924e-06
	Row statistics	Quad						TA						Sol
		Mean	SEM	N				Mean	SEM	N				Mean	SEM	N
	Tas1r2	2.01179e-07	5.94314e-08	4				1.84669e-07	4.07247e-08	4				1.16763e-06	3.37879e-07	5
	Tas1r3	2.74406e-07	5.54526e-08	4				3.24216e-07	7.48192e-08	4				2.04284e-06	5.7201e-07	5

## Sheet: Fig.1d
	Fig.1d - Distribution of GPCRs (odorant not shown) specifically expressed in myocytes using transcriptomics analysis of mRNA pulldown from HA-RiboTag-Myo mice
	Source data
		GPCR mRNA pulldown
	Class C	11
	Class F	13
	Other	4
	Class A	87
	Class B	24

## Sheet: Fig.1e
	Fig.1e - Frequency plot showing the number of GRCRs at different expression levels using 1 log2 binning
	Source data			Histogram				Descriptives
	Expressed GPCRs			Bin Center	Frequency				Expressed GPCRs
	4.4519			3.6	0.100719			Total number of values	139
	3.86545			4.5	0.352518			Number of excluded values	0
	4.97205			5.4	0.273381			Number of binned values	139
	5.94793			6.3	0.100719
	5.58532			7.2	0.0791367			Minimum	3.38831
	4.29549			8.1	0.028777			25% Percentile	4.4201
	4.37775			9	0.00719424			Median	5.16955
	4.74078			9.9	0.00719424			75% Percentile	5.9972
	3.97838			10.8	0.028777			Maximum	12.8234
	11.991			11.7	0.0143885
	4.99958			12.6	0.00719424			Mean	5.5721
	3.91941							Std. Deviation	1.75567
	5.22976							Std. Error of Mean	0.148914
	3.93284
	4.1876							Lower 95% CI of mean	5.27765
	5.21252							Upper 95% CI of mean	5.86654
	4.77286
	5.4053
	5.01827
	5.00152
	7.81522
	10.7417
	4.10319
	5.39288
	5.59966
	5.05774
	4.70866
	7.20354
	3.96031
	4.82089
	5.76495
	4.60217
	7.33535
	5.86794
	5.18399
	5.43191
	4.75561
	4.81658
	6.66181
	5.51965
	4.5201
	11.2563
	5.27774
	4.15385
	4.60269
	5.58377
	5.30374
	5.11744
	5.53106
	4.72191
	4.84621
	5.64093
	4.00852
	4.72827
	4.27245
	7.48616
	5.69751
	4.26377
	7.36774
	4.00908
	5.34506
	4.20013
	4.87729
	5.78235
	5.25026
	4.55176
	10.0928
	4.1913
	4.30026
	4.81307
	4.16109
	4.65467
	4.39565
	5.54828
	4.79072
	5.76406
	4.59604
	6.58157
	6.03736
	4.19103
	3.38831
	5.37665
	4.71686
	4.37428
	3.9058
	3.68831
	4.11567
	3.75563
	7.03508
	5.38734
	10.6971
	4.45781
	3.52975
	4.15352
	4.50523
	6.4013
	6.7219
	4.02762
	4.07163
	6.47193
	6.14301
	4.5614
	4.35559
	6.93234
	5.56374
	7.48741
	5.9972
	5.29042
	5.27878
	6.2782
	8.27229
	7.89005
	5.21462
	4.22695
	4.70931
	4.50993
	4.49392
	5.66598
	6.61062
	4.19763
	4.54196
	4.4201
	5.24197
	4.84221
	10.3583
	6.82944
	5.9207
	10.455
	6.23584
	12.8234
	7.21624
	5.49633
	8.55007
	7.03303
	8.21908
	7.59474
	5.16955
	3.84209
	5.52668

## Sheet: Fig.2a
	Fig.2a - NAD concentration in acidic extracts from mWT and mKO muscles
	Source data				Unpaired t-test
	mWT	mKO			Column B	mKO
	1.55964	2.65232			vs.	vs.
	1.6854	2.26843			Column A	mWT
	1.2134	1.84311
	1.68157	2.25444			Unpaired t test
	1.45943	1.95389			P value	0.001
	1.85715	2.25714			P value summary	**
	1.08001	2.14128			Significantly different (P < 0.05)?	Yes
	1.48677	1.96101			One- or two-tailed P value?	Two-tailed
	2.22288	1.87547			t, df	t=3.88, df=16
					How big is the difference?
					Mean of column A	1.58
					Mean of column B	2.13
					Difference between means (B - A) ± SEM	0.551 ± 0.142
					95% confidence interval	0.250 to 0.852
					R squared (eta squared)	0.485
					F test to compare variances
					F, DFn, Dfd	1.73, 8, 8
					P value	0.453
					P value summary	ns
					Significantly different (P < 0.05)?	No
					Data analyzed
					Sample size, column A	9
					Sample size, column B	9

## Sheet: Fig.2b
	Fig.2b - Quantitation and immunoblotting of poly(ADP)-ribosylation (PAR; nuclear), PARP1 (nuclear), PARP2, and NAMPT in mWT and mKO muscles
	Source data																		t-tests
		mWT								mKO										Below threshold?	P value	Mean of mWT	Mean of mKO	Difference	SE of difference	t ratio	df
	PAR	0.996701	0.975467	0.70373	1.11379	0.85895	0.936609	1.41476		0.796047	0.806732	0.679103	0.398537	0.576208	0.515953	0.570094			PAR	Yes	0.003	1	0.62	0.38	0.101	3.75	12
	PARP1	1.65286	1.442	1.06509	1.03163	0.389512	0.617655	0.801259		1.29134	1.23731	1.10848	1.02547	1.3977	1.41972	1.08771			PARP1	No	0.232	1	1.22	-0.224	0.178	1.26	12
	PARP2	1.33406	0.719927	0.514979	0.755911	1.68377	0.900013	1.09133		0.869757	1.96546	0.956359	0.791842	1.28704	1.31301	1.59855			PARP2	No	0.272	1	1.25	-0.255	0.221	1.15	12
	NAMPT	1.42068	1.24679	0.824198	1.20212	0.597785	0.63471	1.07372		1.31449	0.737834	1.14066	1.13496	1.17459	1.40075	1.21684			NAMPT	No	0.289	1	1.16	-0.16	0.144	1.11	12

## Sheet: Fig.2c
	Fig.2c - Immunoblotting and quantitation of PAR in nuclear extracts from mWT and mKO muscles in response to 5-days of treatment with the PARP1/2 inhibitor, PJ34
	Source data
		Vehicle								PJ34
	mWT	1.35176	1.17645	0.748557	0.507075	0.990028	0.702876	1.29487	1.22839	0.669638	0.35234	0.266591	0.650909	0.605882	0.526166
	mKO	0.406569	0.574605	0.47986	0.337096	0.449922	0.498713	0.280724	0.396455	0.222529	0.108944	0.233215	0.17432	0.134854	0.112359
	ANOVA
	Table Analyzed	PJ34 FC
	Two-way ANOVA	Ordinary
	Alpha	0.05
	Source of Variation	% of total variation	P value	P value summary	Significant?
	Interaction	2.44	0.143	ns	No
	Row Factor	40.9	<0.001	*	Yes
	Column Factor	27.3	<0.001	*	Yes
	ANOVA table	SS (Type III)	DF	MS	F (DFn, DFd)	P value
	Interaction	0.0864	1	0.0864	F (1, 24) = 2.29	P=0.143
	Row Factor	1.45	1	1.45	F (1, 24) = 38.5	P<0.001
	Column Factor	0.969	1	0.969	F (1, 24) = 25.7	P<0.001
	Residual	0.903	24	0.0376
	Difference between column means
	Predicted (LS) mean of Vehicle	0.714
	Predicted (LS) mean of PJ34	0.338
	Difference between predicted means	0.376
	SE of difference	0.0741
	95% CI of difference	0.223 to 0.529
	Difference between row means
	Predicted (LS) mean of mWT	0.756
	Predicted (LS) mean of mKO	0.296
	Difference between predicted means	0.46
	SE of difference	0.0741
	95% CI of difference	0.307 to 0.613
	Interaction CI
	Mean diff, A1 - B1	0.488
	Mean diff, A2 - B2	0.264
	(A1 -B1) - (A2 - B2)	0.224
	95% CI of difference	-0.0814 to 0.530
	(B1 - A1) - (B2 - A2)	-0.224
	95% CI of difference	-0.530 to 0.0814
	Data summary
	Number of columns (Column Factor)	2
	Number of rows (Row Factor)	2
	Number of values	28
	Multiple comparisons
	Compare each cell mean with the other cell mean in that row
	Number of families	1
	Number of comparisons per family	2
	Alpha	0.05
	Šídák's multiple comparisons test	Predicted (LS) mean diff.	95.00% CI of diff.	Below threshold?	Summary	Adjusted P Value
	Vehicle - PJ34
	mWT	0.488	0.238 to 0.738	Yes	*	<0.001
	mKO	0.264	0.0137 to 0.514	Yes	*	0.038
	Test details	Predicted (LS) mean 1	Predicted (LS) mean 2	Predicted (LS) mean diff.	SE of diff.	N1	N2	t	DF
	Vehicle - PJ34
	mWT	1	0.512	0.488	0.105	8	6	4.66	24
	mKO	0.428	0.164	0.264	0.105	8	6	2.52	24

## Sheet: Fig.2d
	Fig.2d - NAD concentration in acidic extracts from mWT and mKO muscles in response to 5-days of treatment with the PARP1/2 inhibitor, PJ34
	Source data
		Vehicle							PJ34
	mWT	1.67352	1.25512	1.80369	1.88897	1.29551	1.18502		2.79103	2.35938	1.83771	1.91255	2.28646	2.25539
	mKO	2.33117	2.27692	1.58208	2.08214	1.7764	2.18645		2.34516	2.68998	1.88082	1.99936	2.08054	1.92159
	ANOVA
	Table Analyzed	nad pj
	Two-way ANOVA	Ordinary
	Alpha	0.05
	Source of Variation	% of total variation	P value	P value summary	Significant?
	Interaction	14.4	0.028	*	Yes
	Row Factor	7.31	0.107	ns	No
	Column Factor	27.1	0.004	**	Yes
	ANOVA table	SS	DF	MS	F (DFn, DFd)	P value
	Interaction	0.558	1	0.558	F (1, 20) = 5.61	P=0.028
	Row Factor	0.283	1	0.283	F (1, 20) = 2.85	P=0.107
	Column Factor	1.05	1	1.05	F (1, 20) = 10.6	P=0.004
	Residual	1.99	20	0.0994
	Difference between column means
	Mean of Vehicle	1.78
	Mean of PJ34	2.2
	Difference between means	-0.419
	SE of difference	0.129
	95% CI of difference	-0.687 to -0.150
	Difference between row means
	Mean of mWT	1.88
	Mean of mKO	2.1
	Difference between means	-0.217
	SE of difference	0.129
	95% CI of difference	-0.486 to 0.0511
	Interaction CI
	Mean diff, A1 - B1	-0.723
	Mean diff, A2 - B2	-0.114
	(A1 -B1) - (A2 - B2)	-0.61
	95% CI of difference	-1.15 to -0.0729
	(B1 - A1) - (B2 - A2)	0.61
	95% CI of difference	0.0729 to 1.15
	Data summary
	Number of columns (Column Factor)	2
	Number of rows (Row Factor)	2
	Number of values	24
	Multiple comparisons
	Compare each cell mean with the other cell mean in that row
	Number of families	1
	Number of comparisons per family	2
	Alpha	0.05
	Šídák's multiple comparisons test	Mean Diff.	95.00% CI of diff.	Below threshold?	Summary	Adjusted P Value
	Vehicle - PJ34
	mWT	-0.723	-1.16 to -0.284	Yes	**	0.001
	mKO	-0.114	-0.554 to 0.326	No	ns	0.788
	Test details	Mean 1	Mean 2	Mean Diff.	SE of diff.	N1	N2	t	DF
	Vehicle - PJ34
	mWT	1.52	2.24	-0.723	0.182	6	6	3.98	20
	mKO	2.04	2.15	-0.114	0.182	6	6	0.625	20

## Sheet: Fig.2e
	Fig.2e - NAD concentration and of PAR in C2C12 cells that were maintained in low glucose and were subsequently spiked with additional glucose or 3-OMG for 6 hours
	Source data
	L	L+H	L+3OMG
	3.955	3.27035	3.58849
	3.91451	3.44673	3.67489
	4.06117	3.67605	3.51261
	4.06	3.79	3.43
	ANOVA
	Table Analyzed	NAD in 3-OMG
	Data sets analyzed	B-D
	ANOVA summary
	F	11.4
	P value	0.003
	P value summary	**
	Significant diff. among means (P < 0.05)?	Yes
	R squared	0.717
	Brown-Forsythe test
	F (DFn, DFd)	5.20 (2, 9)
	P value	0.031
	P value summary	*
	Are SDs significantly different (P < 0.05)?	Yes
	Bartlett's test
	Bartlett's statistic (corrected)	3.6
	P value	0.166
	P value summary	ns
	Are SDs significantly different (P < 0.05)?	No
	ANOVA table	SS	DF	MS	F (DFn, DFd)	P value
	Treatment (between columns)	0.538	2	0.269	F (2, 9) = 11.4	P=0.003
	Residual (within columns)	0.212	9	0.0235
	Total	0.75	11
	Data summary
	Number of treatments (columns)	3
	Number of values (total)	12
	Multiple comparisons
	Number of families	1
	Number of comparisons per family	3
	Alpha	0.05
	Šídák's multiple comparisons test	Mean Diff.	95.00% CI of diff.	Below threshold?	Summary	Adjusted P Value
	L vs. L+H	0.452	0.135 to 0.769	Yes	**	0.007	B-C
	L vs. L+3OMG	0.446	0.129 to 0.763	Yes	**	0.008	B-D
	L+H vs. L+3OMG	-0.00572	-0.323 to 0.311	No	ns	>0.999	C-D
	Test details	Mean 1	Mean 2	Mean Diff.	SE of diff.	n1	n2	t	DF
	L vs. L+H	4	3.55	0.452	0.108	4	4	4.17	9
	L vs. L+3OMG	4	3.55	0.446	0.108	4	4	4.11	9
	L+H vs. L+3OMG	3.55	3.55	-0.00572	0.108	4	4	0.0527	9

[truncated: 40 more sheets: Fig.2f, Fig.2g, Fig.2h, Fig.2i, Fig.2j, Fig.3a, Fig.3b, Fig.3c, Fig.3e, Fig.3f, Fig.3g, Fig.4a, Fig.4c, Fig.4d, Fig.4e, Fig.4f, Fig.s1b, Fig.s1c, Fig.s2, Fig.s3a …]
